# Supplementary material for: Optimized PAMAM coated magnetic nanoparticles for simultaneous hyperthermic treatment and contrast enhanced MRI diagnosis
Source: Royal Society of Chemistry journal article supplement (doi:10.1039/c7ra07589h), 2017-01-01
Supplement: c7ra07589h1.pdf [file c7ra07589h1.pdf]

## Electronic Supplementary Information

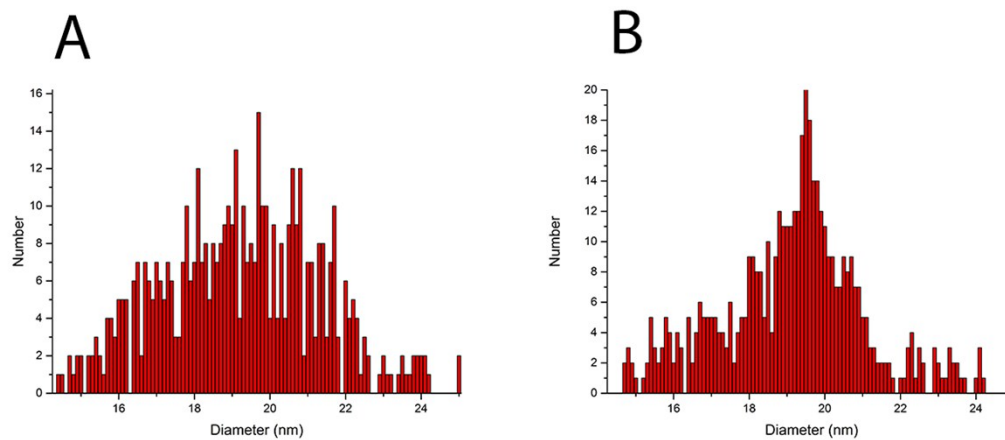

Figure S1: Size distribution obtain by TEM images analysis for samples A1 (A) and A2 (B)

A

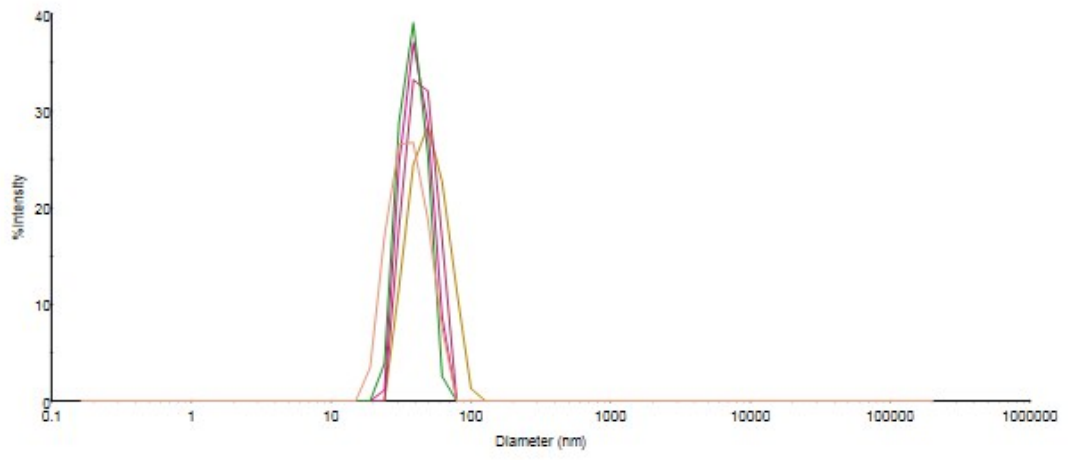

B

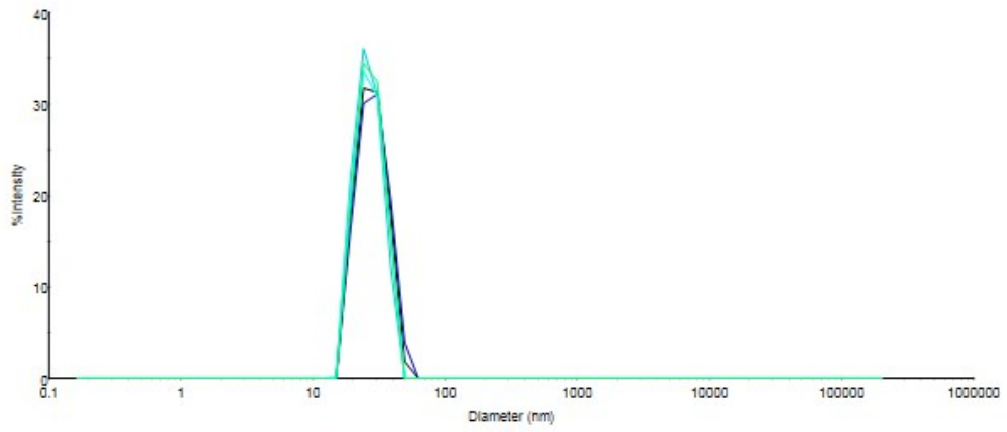

Figure S2: DLS size distribution for sample A1 (A) and A2 (B), repeated over weeks.

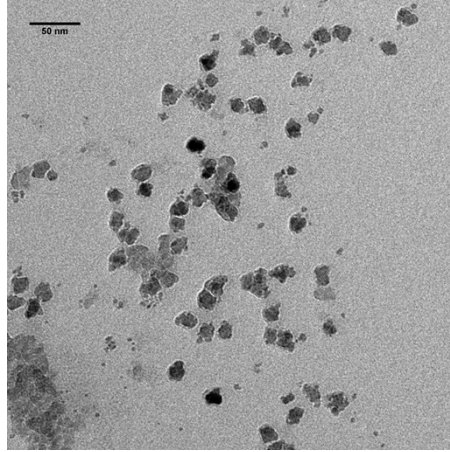

Figure S3: TEM image of Sample S2, obtained by deposition of the water suspension on the TEM grid.

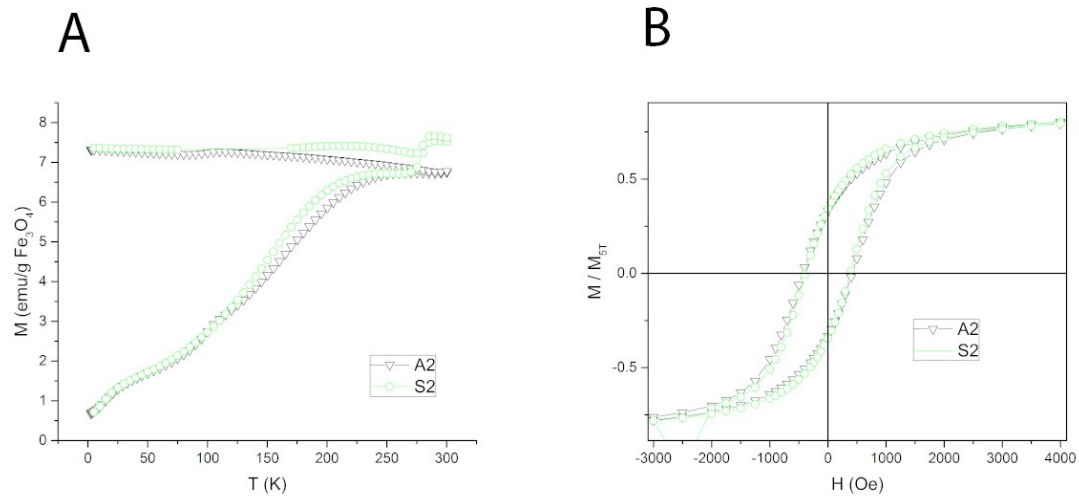

Figure S4: A) ZFC and FC magnetization curves acquired by applying a 5mT probing field, and B) hysteresis cycles at  $T=2.5\text{K}$  for samples A1 (dry powder) and S2 (solution; All the data are reported per gram of magnetic material,  $\text{Fe}_3\text{O}_4$ , evaluated from ICP-MS data.
